# Supplementary material for: Elevated P75NTR expression causes death of engrailed-deficient midbrain dopaminergic neurons by Erk1/2 suppression
Source: PubMed Central journal article supplement (PMC2667502; doi:10.1186/1749-8104-4-11), 2009-03-16
Supplement: 1749-8104-4-11-S1.pdf [file 1749-8104-4-11-S1.pdf]

## List of compounds and concentrations

|    | Compound                       | Solvent          | Final Conc. | Time | Activity                  | Reference                       | Source              |
|----|--------------------------------|------------------|-------------|------|---------------------------|---------------------------------|---------------------|
| 1  | 6-OHDA                         | Medium           | 200 $\mu$ M | 24h  | mesDA specific neurotoxin | (Fink et al., 1992)             | Sigma-Aldrich       |
| 2  | Ac-DEVD-CMK                    | DMSO             | 1 $\mu$ M   | 72h  | Caspase-3 inhibitor       | (Mocanu et al., 2000)           | EMD Biosciences     |
| 3  | Apoptosis Activator 2          | DMSO             | 200nM       | 24h  | Apaf-1 oligomerization    | (Nguyen and Wells, 2003)        | EMD Biosciences     |
| 4  | Bax-Inhibiting Peptide, V5     | H <sub>2</sub> O | 100 $\mu$ M | 72h  | Ku70 Bax inhibiting       | (Sawada et al., 2003)           | EMD Biosciences     |
| 5  | Caspase Inhibitor II           | DMSO             | 2.7 $\mu$ M | 72h  | Pan-Caspase inhibitor     | (Thornberry and Lazebnik, 1998) | EMD Biosciences     |
| 6  | Caspase-9 Inhibitor (Aldehyde) | DMSO             | 20 $\mu$ M  | 72h  | Caspase-9 inhibitor       | (Fadeel et al., 1999)           | AG. Scientific      |
| 7  | Chelerythrine Chloride         | DMSO             | 4 $\mu$ M   | 18h  | Bcl-Xl inhibiting factor  | (Tanaka et al., 2004)           | Alexis Biochemicals |
| 8  | HA14                           | DMSO, PBS        | 30 $\mu$ M  | 18h  | Bcl2 inhibiting peptide   | (Wang et al., 2000)             | Alexis Biochemicals |
| 9  | MPP+                           | H <sub>2</sub> O | 33 $\mu$ M  | 24h  | mesDA specific neurotoxin | (Langston et al., 1984)         | Sigma-Aldrich       |
| 10 | Pifithrin- $\alpha$            | DMSO             | 10 $\mu$ M  | 72h  | p53 inhibitor             | (Hoagland et al., 2005)         | Sigma-Aldrich       |
| 11 | Prima-1                        | H <sub>2</sub> O | 70 $\mu$ M  | 18h  | p53 activator             | (Bykov et al., 2002),           | Alexis Biochemicals |
| 12 | Rex                            | PBS              | 20mg/ml     | 72h  | P75 inhibitor             | (Kruttsagen et al., 1998)       | Louis Reichardt     |
| 13 | Rotenone                       | DMSO             | 40nM        | 24h  | mesDA specific neurotoxin | (Testa et al. 2005)             | Sigma-Aldrich       |
| 14 | SP600125                       | DMSO             | 7 $\mu$ M   | 72h  | JNK inhibitor             | (Wang et al., 2004)             | EMD Biosciences     |
| 15 | TNF- $\alpha$                  | PBS              | 5ng/ml      | 24h  | Apoptosis inducer         | (Adams, 2003)                   | Sigma-Aldrich       |
| 16 | U0126                          | DMSO             | 400nM       | 72h  | Mek inhibitor             | (Duncia et al., 1998),          | EMD Biosciences     |
| 17 | Z-IE(OMe)TD(OMe)-FMK           | DMSO             | 1 $\mu$ M   | 72h  | Caspase-8 inhibitor       | (Martin et al., 1998)           | EMD Biosciences     |

## Literature

- Adams, J.M. (2003) Ways of dying/ multiple pathways to apoptosis. *Genes Dev.* *17*, 2481-95.
- Bykov, V.J., N. Issaeva, A. Shilov, M. Hultcrantz, E. Pugacheva, P. Chumakov, J. Bergman, K.G. Wiman, and G. Selivanova. (2002) Restoration of the tumor suppressor function to mutant p53 by a low-molecular-weight compound. *Nature medicine.* *8*, 282-8.
- Duncia, J.V., J.B. Santella, 3rd, C.A. Higley, W.J. Pitts, J. Wityak, W.E. Fietze, F.W. Rankin, J.H. Sun, R.A. Earl, A.C. Tabaka, C.A. Teleha, K.F. Blom, M.F. Favata, E.J. Manos, A.J. Daulerio, D.A. Stradley, K. Horiuchi, R.A. Copeland, P.A. Scherle, J.M. Trzaskos, R.L. Magolda, G.L. Trainor, R.R. Wexler, F.W. Hobbs, and R.E. Olson. (1998) MEK inhibitors: the chemistry and biological activity of U0126, its analogs, and cyclization products. *Bioorg. Med. Chem. Lett.* *8*, 2839-44.
- Fadeel, B., Z. Hassan, E. Hellstrom-Lindberg, J.I. Henter, S. Orrenius, and B. Zhivotovsky. (1999) Cleavage of Bcl-2 is an early event in chemotherapy-induced apoptosis of human myeloid leukemia cells. *Leukemia.* *13*, 719-28.
- Fink, D.W., P.T. Horn, and B.L. Mirkin. (1992) Differential effects of 6-hydroxydopamine-induced ablation of peripheral and central adrenergic axons on C-1300 murine neuroblastoma tumor growth and catecholamine concentration in the A/J mouse. *The Journal of pharmacology and experimental therapeutics.* *262*, 1070-5.
- Hoagland, M.S., E.M. Hoagland, and H.I. Swanson. (2005) The p53 inhibitor pifithrin-alpha is a potent agonist of the aryl hydrocarbon receptor. *The Journal of pharmacology and experimental therapeutics.* *314*, 603-10.
- Kruttgen, A., J.C. Moller, J.V. Heymach, Jr., and E.M. Shooter. (1998) Neurotrophins induce release of neurotrophins by the regulated secretory pathway. *Proc. Natl. Acad. Sci. U S A.* *95*, 9614-9.
- Langston, J.W., I. Irwin, E.B. Langston, and L.S. Forno. (1984) 1-Methyl-4-phenylpyridinium ion (MPP<sup>+</sup>): identification of a metabolite of MPTP, a toxin selective to the substantia nigra. *Neuroscience letters.* *48*, 87-92.

- Martin, D.A., R.M. Siegel, L. Zheng, and M.J. Lenardo. (1998) Membrane oligomerization and cleavage activates the caspase-8 (FLICE/MACHalpha1) death signal. *The Journal of biological chemistry*. 273, 4345-9.
- Mocanu, M.M., G.F. Baxter, and D.M. Yellon. (2000) Caspase inhibition and limitation of myocardial infarct size: protection against lethal reperfusion injury. *British journal of pharmacology*. 130, 197-200.
- Nguyen, J.T., and J.A. Wells. (2003) Direct activation of the apoptosis machinery as a mechanism to target cancer cells. *Proc. Natl. Acad. Sci. U S A*. 100, 7533-8.
- Sawada, M., W. Sun, P. Hayes, K. Leskov, D.A. Boothman, and S. Matsuyama. (2003) Ku70 suppresses the apoptotic translocation of Bax to mitochondria. *Nat. Cell Biol.* 5, 320-9.
- Tanaka, K., M. Honda, and T. Takabatake. (2004) Anti-apoptotic effect of atorvastatin, a 3-hydroxy-3-methylglutaryl coenzyme a reductase inhibitor, on cardiac myocytes through protein kinase C activation. *Clin. Exp. Pharmacol. Physiol.* 31, 360-4.
- Testa, C.M., T.B. Sherer, and J.T. Greenamyre. (2005) Rotenone induces oxidative stress and dopaminergic neuron damage in organotypic substantia nigra cultures. *Brain Res. Mol. Brain Res.* 134, 109-18.
- Thornberry, N.A., and Y. Lazebnik. (1998) Caspases: enemies within. *Science*. 281, 1312-6.
- Wang, J.L., D. Liu, Z.J. Zhang, S. Shan, X. Han, S.M. Srinivasula, C.M. Croce, E.S. Alnemri, and Z. Huang. (2000) Structure-based discovery of an organic compound that binds Bcl-2 protein and induces apoptosis of tumor cells. *Proc. Natl. Acad. Sci. U S A*. 97, 7124-9.
- Wang, W., L. Shi, Y. Xie, C. Ma, W. Li, X. Su, S. Huang, R. Chen, Z. Zhu, Z. Mao, Y. Han, and M. Li. (2004) SP600125, a new JNK inhibitor, protects dopaminergic neurons in the MPTP model of Parkinson's disease. *Neurosci. Res.* 48, 195-202.
